# Supplementary material for: The female mouse is resistant to mild vitamin B3 deficiency
Source: PubMed Central journal article supplement (PMC8783905; doi:10.1007/s00394-021-02651-8), 2021-08-02
Supplement: 394_2021_2651_MOESM1_ESM.pdf [file 394_2021_2651_MOESM1_ESM.pdf]

## Supplementary material

Supplementary Table 1. Composition of diets

| <b>Ingredients (g·kg<sup>-1</sup> diet)</b>      | <b>30NR</b> | <b>0NR</b> |
|--------------------------------------------------|-------------|------------|
| Casein                                           | 100.0       | 100.0      |
| Wheat starch                                     | 233.1       | 233.1      |
| Gelatin (hydrolysed)                             | 100.0       | 100.0      |
| Maltodextrin                                     | 100.0       | 100.0      |
| Sugar                                            | 100.0       | 100.0      |
| Dextrose                                         | 50.0        | 50.0       |
| Arbocel B800                                     | 50.0        | 50.0       |
| Linseed oil                                      | 4.0         | 4.0        |
| Palm oil                                         | 206.0       | 206.0      |
| Mineral mixture AIN-93*                          | 35.0        | 35.0       |
| Vitamin mixture AIN-93*                          | 10.0        | 10.0       |
| L-cystine                                        | 3.25        | 3.25       |
| L-phenylalanine                                  | 4.32        | 4.32       |
| Choline chloride 50%                             | 1.55        | 1.55       |
| Nicotinamide riboside (mg·kg <sup>-1</sup> diet) | 30.0        | 0.0        |
| Calculated amount of L-tryptophan (%)            | 1.15        | 1.15       |
| Calculated energy (kcal·kg <sup>-1</sup> )       | 4653        | 4653       |
| Carbohydrate (% of total energy)                 | 41          | 41         |
| Fat (% of total energy)                          | 40          | 40         |
| Protein (% of total energy)                      | 19          | 19         |

\* Contains no vitamin B<sub>3</sub> but sufficient minerals and the other vitamins, including iron, vitamin B1, B2 and B6 at the recommended AIN93 levels (Reeves et al., 1993)

Supplementary Table 2. RT-qPCR primer sequences.

| Gene name             | Forward primer              | Reverse primer                | Tissue     |
|-----------------------|-----------------------------|-------------------------------|------------|
| <i>Mttp</i>           | GTGGAGGAATCCTGATGGTGA       | TGATCTTAGGTGTACTTTTGCCC       | Liver      |
| <i>Dgat2</i>          | CTATTTGGCTACGTTGGCTGGTAAC   | TTGGAGAGCAAGTAGTCTATGGTGTC    | Liver      |
| <i>ApoB</i>           | TACTTCCACCCACAGTCCCC        | AGGGAGCCTAGCAATCTGGA          | Liver      |
| <i>Anp32a</i>         | CCGTGGGTTTCGGGGTTTATT       | CTCTTTCACATCAGAGGGCGT         | WAT        |
| <i>Map2k1</i>         | TGGGCACGAGATCCTACATG        | TGGCATCAGGAGGAGGAATG          | WAT        |
| <i>Mapk1</i>          | ATGACCCAAGTGATGAGCCC        | AGCCCTTGTCTGACCAATTT          | WAT        |
| <i>Mthfs</i>          | GTCTCTCCTCCTCACGCAGA        | GGTCAAGTCCACCAGTGGATAA        | WAT        |
| <i>Mthfsl</i>         | CGGTGCTTGCCAGGAATG          | GCAATCACCTTCTGCGTGAG          | WAT        |
| <i>Qdpr</i>           | CATTGCTGTGCTCCCCGTTA        | TCCTGAGTTTGGCCGTTTGT          | WAT        |
| <i>Slc2a4 (glut4)</i> | CCATTCCCTGGTTCATTGTG        | GTTTTGCCCTCAGTCATTC           | WAT        |
| <i>Tnk2</i>           | ACTTTGGGCTGATGCGAGCACT      | AAGGTGCGTGTCTTCAGGCTCT        | WAT        |
|                       |                             |                               |            |
| <u><i>Canx</i></u>    | GCAGCGACCTATGATTGACAACC     | GCTCCAAACCAATAGCACTGAAAGG     | Liver      |
| <u><i>Hprt 1</i></u>  | TGACACTGGTAAAACAATGCAAACCTG | GAGGTCCTTTTCACCAGCAAGCT       | Liver      |
| <u><i>Rps 15</i></u>  | CGGAGATGGTGGGTAGCATGG       | ACGGGTTTGTAGGTGATGGAGAAC      | Liver, WAT |
| <u><i>B2m</i></u>     | CCCCACTGAGACTGATACATACGC    | AGAAACTGGATTTGTAATTAAGCAGGTTC | WAT        |

Annealing temperature was 60°C. Underlined genes are used as reference genes.
